# Supplementary material for: Structure-Activity Relationship Analysis of Benzotriazine Analogues as HIV-1 Latency-Reversing Agents
Source: PubMed Central journal article supplement (PMC7526807; doi:10.1128/aac.00888-20), 2020-07-22
Supplement: AAC.00888-20-s0001.pdf [file AAC.00888-20-s0001.pdf]

## Supplemental Information

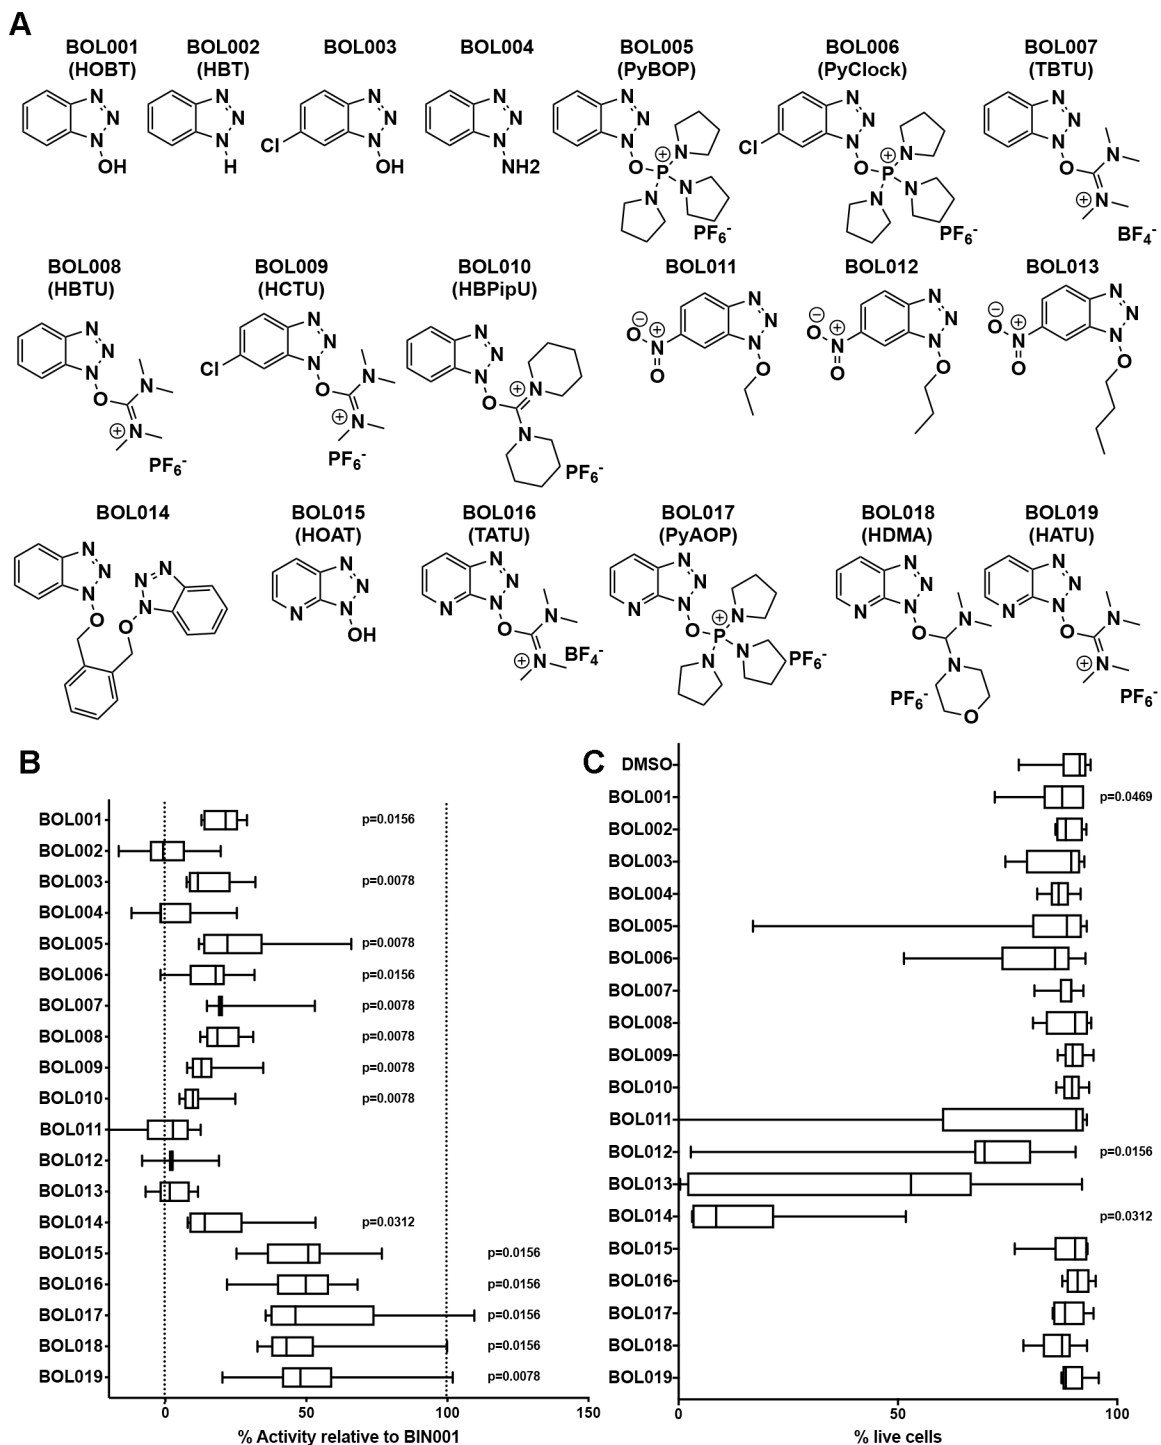

**Sup Figure 1. Screening for biological activity of benzotriazole analogues. A.** Structure of 21 commercially available benzotriazole analogues. **B.** Analysis of activity of

the different analogues relative to BIN001 (HODHBt), the derivative with the highest LRA activity, in 9 different donors. Error bars indicate maximum and minimum and Wilcoxon signed rank test was used to calculate p values. **C.** Analysis of toxicity of the different analogues. Error bars indicate maximum and minimum. Nonparametric Wilcoxon matched-pairs signed rank test relative to DMSO control was used to calculate p values.

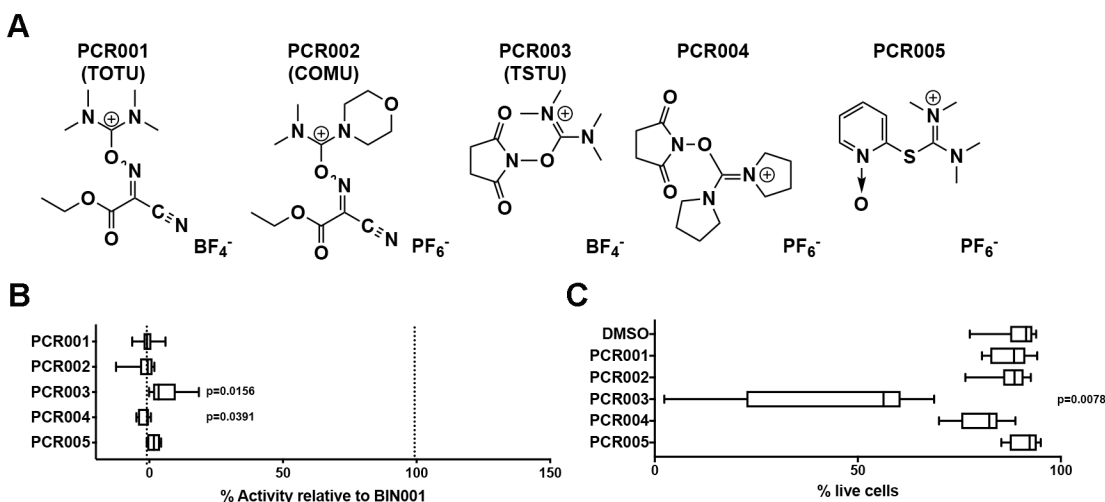

**Sup Figure 2. Screening for biological activity of peptide couple reagents. A.** Structure of 5 commercially available protein coupling reagents. **B.** Analysis of activity of the different analogues relative to BIN001 (HODHBt), the derivative with the highest LRA activity, in 9 different donors. Error bars indicate maximum and minimum and Wilcoxon signed rank test was used to calculate p values. **C.** Analysis of toxicity of the different analogues. Error bars indicate maximum and minimum. Nonparametric Wilcoxon matched-pairs signed rank test relative to DMSO control was used to calculate p values.

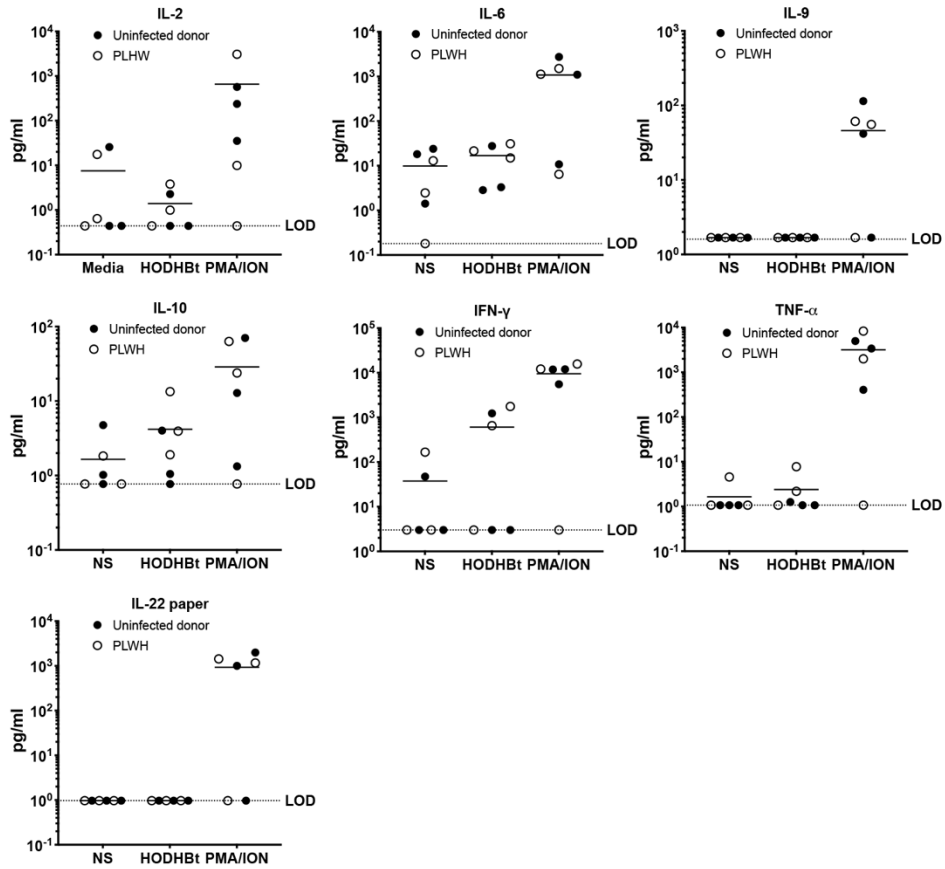

**Sup Figure 3. Levels of secreted cytokines induced by HODHBt.** Levels of several pro- and anti-inflammatory cytokines in the supernatant of PBMCs from 3 HIV-negative donors (uninfected donor) or 3 ART-suppressed PLWH 48 hours after treatment with either HODHBt or PMA plus Ionomycin (PMA/IONO). LOD: limit of detection.

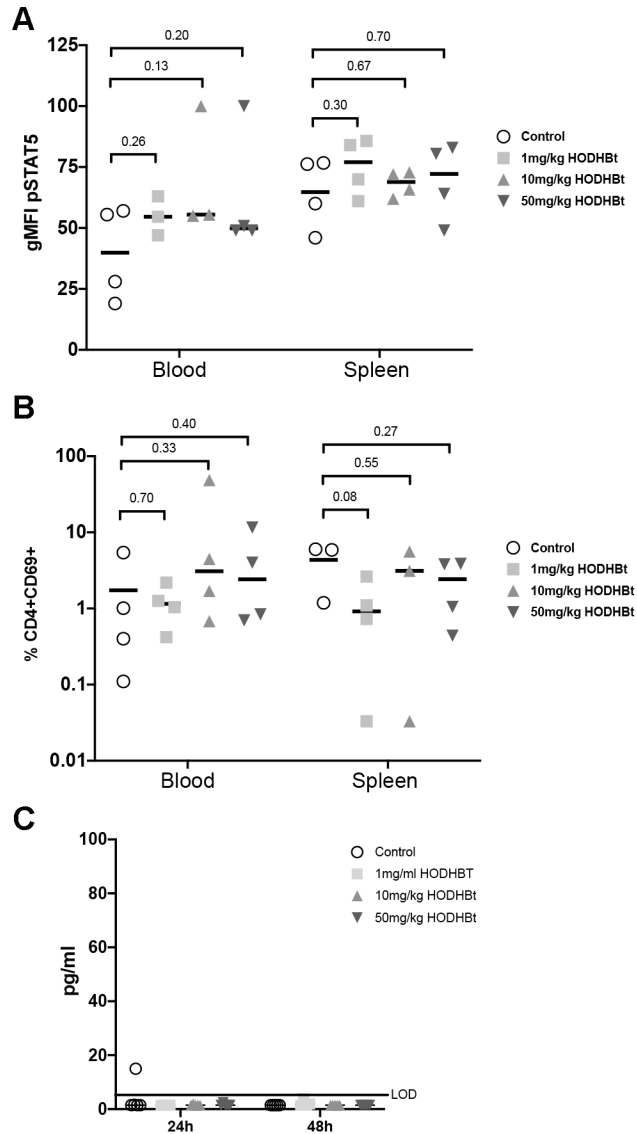

**Sup Figure 4. Pharmacodynamics of HODHBt. A.** Levels of pSTAT5 were measured in either PBMCs isolated from blood or total splenocytes 48 hours post intraperitoneal injection of HODHBt at the concentrations indicated. **B.** Levels of CD69 measured in CD4 T cells from blood or total splenocytes 48 hours post intra peritoneal injection of HODHBt at the concentrations indicated. Unpaired t-test was used to calculate p values. **C.** Levels of IL-6 in serum isolated 24 and 48 hours post intra peritoneal injection of HODHBt at the concentrations indicated. LOD: limit of detection.
